# Supplementary material for: TTK inhibition radiosensitizes basal-like breast cancer through impaired homologous recombination
Source: JCI journal article supplement (doi:10.1172/jci130435), 2020-01-20
Supplement: sd1 [file 1]

## **Supplemental Methods:**

### **IC<sub>50</sub> Analysis**

2,000 cells per well were plated in a 96 well plate and allowed to adhere overnight. Drug was added at varying concentrations (1nM-10μM) and the cells were incubated for an additional 72 hours. After 72 hours, AlamarBlue (Thermo-Fisher) was added at 1/10 the volume of media and incubated for 3 hours at 37°C. The plate was read using a BioTek™ Cytation™ 3 Cell Imaging Multi-Mode Reader. A dose-response curved was made using GraphPad Prism 7 software.

### **Proliferation Assay**

Cells were plated in 96 well plates (1,500 cells/well) and allowed to sit overnight. The following day cells were pretreated with DMSO or B909 for 1 hour before radiation (2 Gy). Cells were then placed in an IncuCyte® Machine which measured the confluence of the plate every 4 hours for ~4 days.

# Supplemental Figure 1

S1A

Local Recurrence-Free Survival in Breast Cancer Treated with Radiation- Servant Dataset QUARTILE

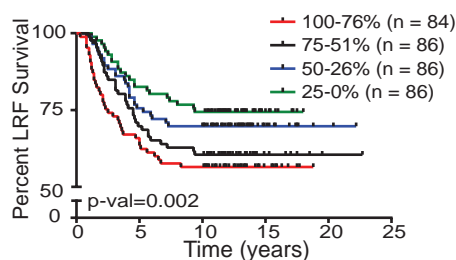

S1B

Local Recurrence-Free Survival in Breast Cancer Treated with Radiation- Vande Vijver Dataset QUARTILE

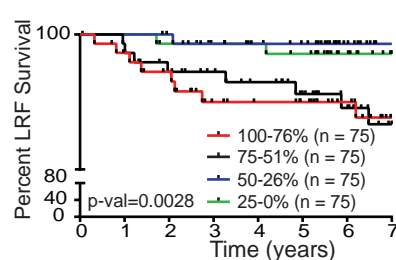

S1C

Local Recurrence-Free Survival in Breast Cancer Treated with Radiation- Wang Dataset QUARTILE

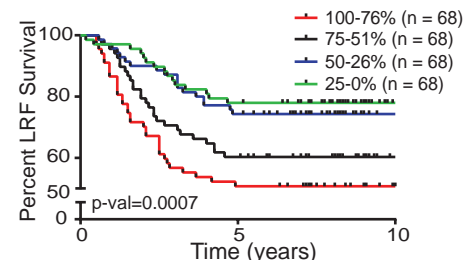

S1D

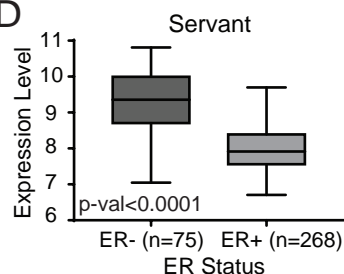

S1E

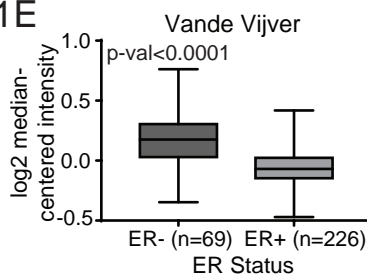

S1F

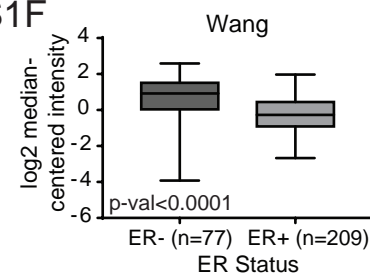

S1G

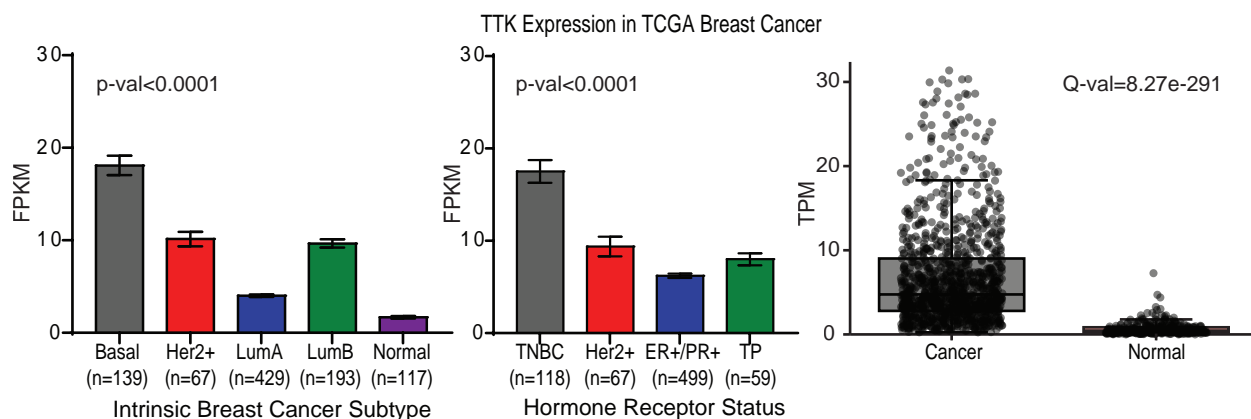

S1H

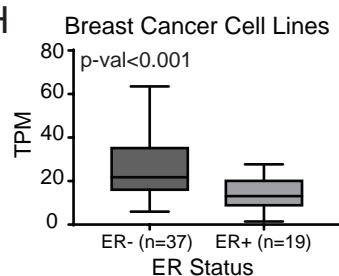

S1I

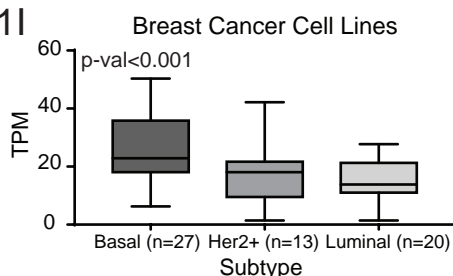

S1J

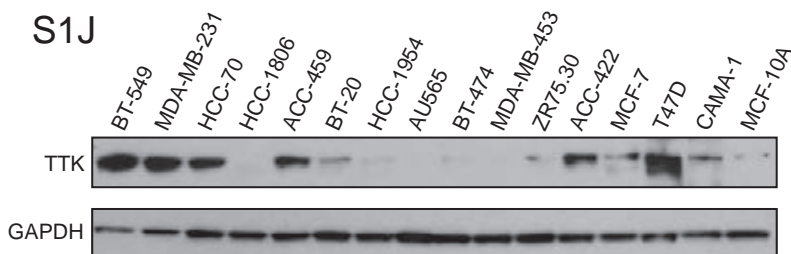

S1K

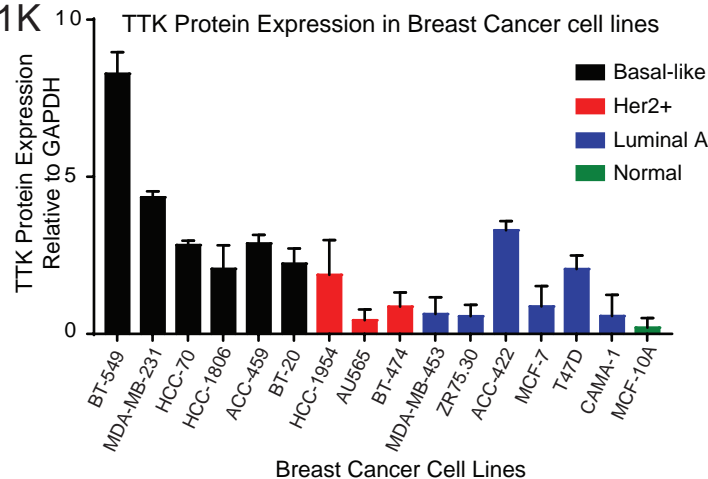

S1L

| Cell Line Mutations |                                       |
|---------------------|---------------------------------------|
| Cell Line           | Mutations                             |
| MDA-MB-231          | BRAF, CDKN2A, KRAS, NF2, TP53, PDGFRA |
| BT-549              | PTEN, RB1, TP53                       |
| SUM-159             | PIK3CA, TP53, HRAS                    |
| PDX-4664            | EGFR, CK19, RPL39                     |

**Supplemental Figure 1:** TTK expression correlates with local recurrence-free survival (LRFS) in breast cancer (BC) and is overexpressed in estrogen receptor-negative (ER-) BC compared to estrogen receptor-positive (ER+) breast cancer. **A-C)** Kaplan Meier analysis by quartile expression demonstrates higher TTK expression correlates with decreased LRFS in the Servant (A), Vande Vijver (B), and Wang (C) datasets. **D-F)** TTK is overexpressed in ER- BC compared to ER+ BC in the Servant (D), Vande Vijver (E), and Wang (F) datasets. Log-rank (Mantel-Cox) test was used for analyses of survival curves. **G)** TTK is overexpressed in patients with TNBC/basal-like BC compared to other subtypes in the TCGA BC dataset. Additionally, TTK is overexpressed in BC compared to normal tissue. **H&I)** TTK is overexpressed in ER- BC cell lines compared to ER+ BC cell lines and TTK has highest expression in basal-like BC cell lines compared to other subtypes using CCLE data measured in transcripts per million (TPM). **J&K)** TTK protein expression is highest in MDA-MB-231 and BT-549 BC cell lines and TTK protein expression is highest in basal-like BC compared to other subtypes. **L)** Mutational landscapes of cell lines and PDX models used for *in vitro* and *in vivo* studies. Two-sided Student's *t*-test and one-way ANOVA were used for analyses. Error bars represent standard deviation.

# Supplemental Figure 2

S2A

GSEA concept positively correlated

N Enrichment Score  
3.5 3.6 3.7 3.8 3.9 4.0

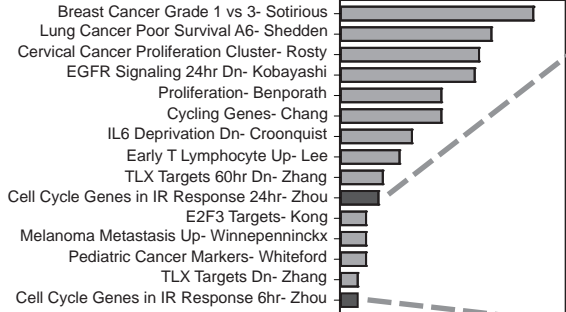

S2B

GSEA concept negatively correlated

N Enrichment Score  
-2.8 -3.0 -3.2 -3.4 -3.6 -3.8

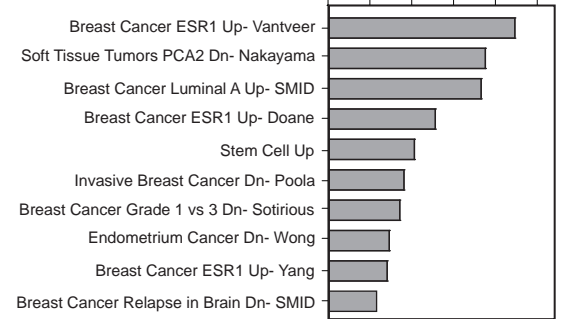

S2C

| MDA-MB-231 shRNA Clonogenic Survival Assay |                   |              |
|--------------------------------------------|-------------------|--------------|
| Treatment                                  | Enhancement Ratio | Cytotoxicity |
| shControl No Dox                           | 1.0               | 1.0          |
| shControl Dox                              | 0.98 ±0.04        | 1.00 ±0.05   |
| shTTK#1 No Dox                             | 1.0               | 1.0          |
| shTTK#1 Dox                                | 1.50 ±0.09        | 0.17 ±0.06   |
| shTTK#2 No Dox                             | 1.0               | 1.0          |
| shTTK#2 Dox                                | 1.23 ±0.02        | 0.73 ±0.24   |

S2D

| BT-549 shRNA Clonogenic Survival Assay |                   |              |
|----------------------------------------|-------------------|--------------|
| Treatment                              | Enhancement Ratio | Cytotoxicity |
| shControl No Dox                       | 1.0               | 1.0          |
| shControl Dox                          | 0.97 ±0.02        | 0.79 ±0.10   |
| shTTK#1 No Dox                         | 1.0               | 1.0          |
| shTTK#1 Dox                            | 1.23 ±0.02        | 0.91 ±0.25   |
| shTTK#2 No Dox                         | 1.0               | 1.0          |
| shTTK#2 Dox                            | 1.21 ±0.05        | 0.61 ±0.07   |

S2E

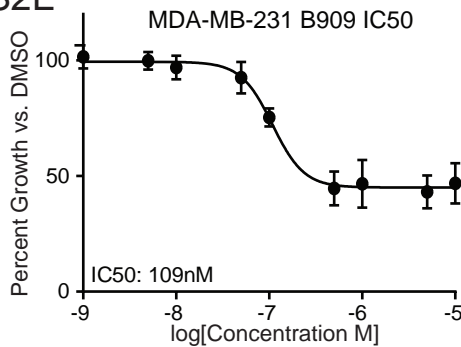

S2F

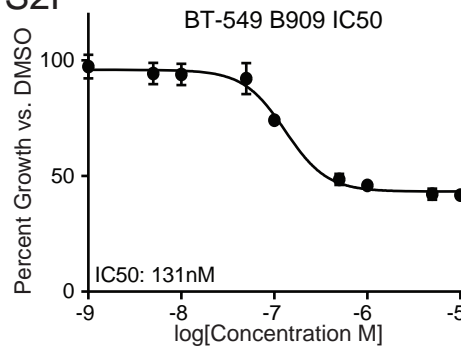

S2G

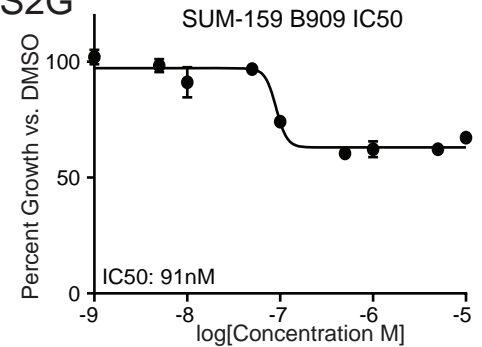

S2H

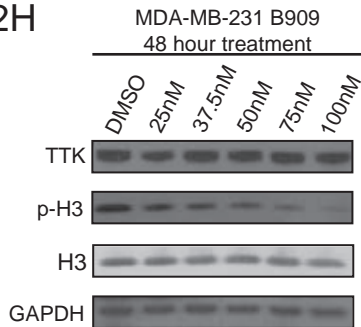

S2I

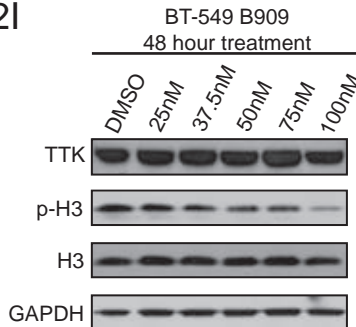

S2J

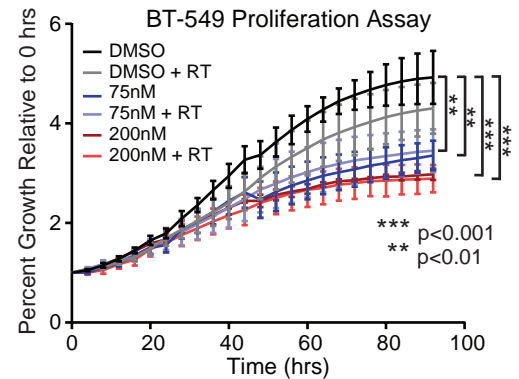

S2K

| MDA-MB-231 B909 Clonogenic Survival Assay |                   |              |
|-------------------------------------------|-------------------|--------------|
| Treatment                                 | Enhancement Ratio | Cytotoxicity |
| DMSO                                      | 1.0               | 1.0          |
| 25nM                                      | 1.16 ±0.01        | 0.69 ±0.24   |
| 37.5nM                                    | 1.26 ±0.02        | 0.49 ±0.31   |
| 50nM                                      | 1.37 ±0.03        | 0.29 ±0.10   |

S2L

| BT-549 B909 Clonogenic Survival Assay |                   |              |
|---------------------------------------|-------------------|--------------|
| Treatment                             | Enhancement Ratio | Cytotoxicity |
| DMSO                                  | 1.0               | 1.0          |
| 25nM                                  | 1.14 ±0.03        | 0.71 ±0.19   |
| 37.5nM                                | 1.20 ±0.07        | 0.87 ±0.13   |
| 50nM                                  | 1.32 ±0.07        | 0.41 ±0.06   |

S2M

| SUM-159 B909 Clonogenic Survival Assay |                   |              |
|----------------------------------------|-------------------|--------------|
| Treatment                              | Enhancement Ratio | Cytotoxicity |
| DMSO                                   | 1.0               | 1.0          |
| 25nM                                   | 1.19 ±0.06        | 0.69 ±0.16   |
| 37.5nM                                 | 1.46 ±0.13        | 0.63 ±0.19   |
| 50nM                                   | 1.97 ±0.22        | 0.36 ±0.21   |

S2N

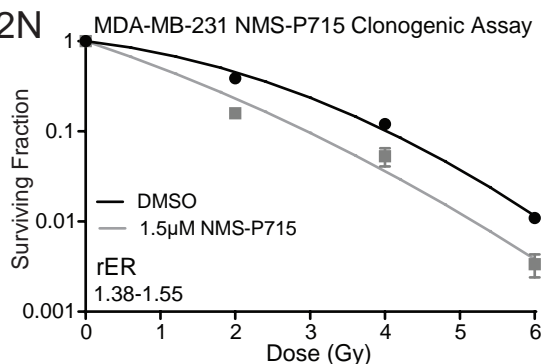

S2O

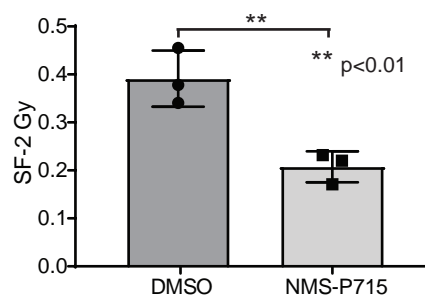

| MDA-MB-231 NMS-P715 Clonogenic Survival Assay |                   |              |
|-----------------------------------------------|-------------------|--------------|
| Treatment                                     | Enhancement Ratio | Cytotoxicity |
| DMSO                                          | 1.0               | 1.0          |
| 1.5µM                                         | 1.47 ±0.07        | 0.70 ±0.22   |

**Supplemental Figure 2:** Gene set enrichment analysis (GSEA) correlates TTK with radiation response and TTK inhibition radiosensitizes multiple basal-like breast cancer (BC) cell lines. **A)** GSEA identifies cell cycle genes at 6 and 24 hours as the top positively correlated concepts with TTK expression in TCGA BC dataset. **B)** GSEA concepts negatively correlated with TTK expression in the TCGA BC dataset. **C&D)** Summary of radiation enhancement ratios (rER) and cytotoxicity caused by TTK knockdown in MDA-MB-231 (C) and BT-549 (D) cells. **E-G)** IC50 of proliferation analyses of B909 in MDA-MB-231 (E) (109nM), BT-549 (F) (131nM), and SUM-159 (G) (91nM) cell lines. Error bars represent SEM. **H&I)** B909 reduces pH3 (Ser10) expression dose dependently in MDA-MB-231 (H) and BT-549 (I) cell lines. **J)** Proliferation assays of BT-549 cells treated with RT alone, B909 alone, or a combination treatment. Two-way ANOVA with Dunnett's Multiple Comparisons test was used to compare treatment groups. Data are a representation of 2-3 replicates. **K-M)** Radiation enhancement ratio (rER) and cytotoxicity of B909 clonogenic survival assays in MDA-MB-231 (J), BT-549 (K), and SUM-159 (L) cell lines. **N)** Clonogenic survival assay and SF-2 Gy in MDA-MB-231 cells using the TTK inhibitor NMS-P715 (1.5 $\mu$ M). **O)** Summary of radiation enhancement ratios (rER) and cytotoxicity caused by NMS-P715. Unless otherwise stated, data represent the mean of three independent experiments. Error bars represent SEM for clonogenic survival assays and proliferation assays and standard deviation for SF-2 Gy. A Two-sided Student's *t*-test was used for comparison.

\*\* $p < 0.01$ , \*\*\* $p < 0.001$

# Supplemental Figure 3

S3A

MDA-MB-231 shTTK#1  $\gamma$ H2AX

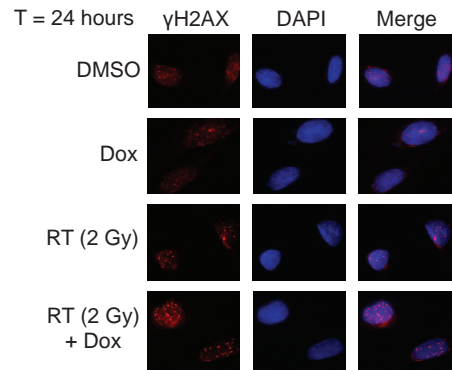

S3B

BT-549 B909  $\gamma$ H2AX

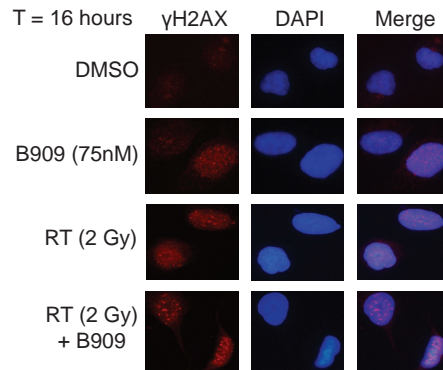

S3C

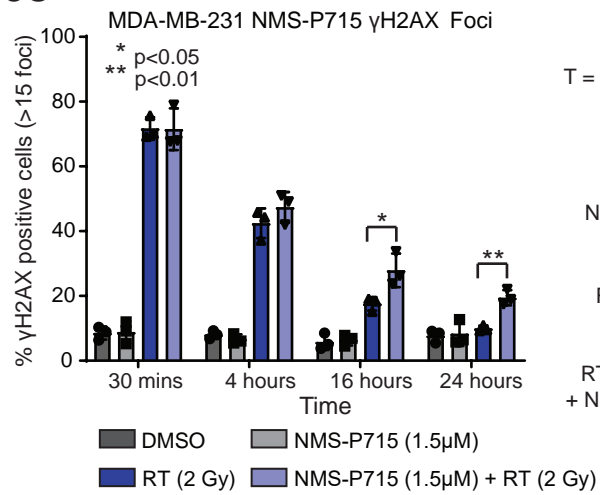

S3D

MDA-MB-231 NMS-P715  $\gamma$ H2AX

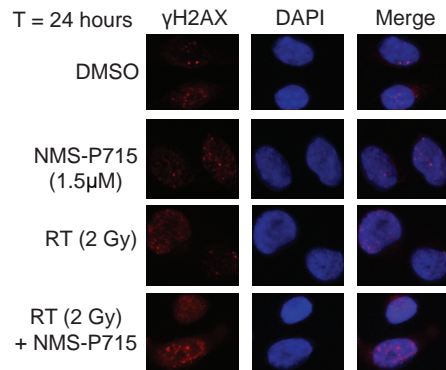

**Supplemental Figure 3:** Representative images of  $\gamma$ H2AX foci. **A)** Representative images of  $\gamma$ H2AX foci in MDA-MB-231 shTTK#1 cells 24 hours after radiation. **B)** Representative images of  $\gamma$ H2AX foci in BT-549 cells treated with Bayer 1161909 at 16 hours after radiation. **C)** Combination treatment of TTK inhibition (NMS-P715) and RT lead to persistent double strand DNA damage over time. **D)** Representative images of  $\gamma$ H2AX foci at 24 hours in MDA-MB-231 cells treated with NMS-P715. Data represent the mean of three independent experiments repeated in triplicate, with ~100 cells counted for each experiment, and error bars represent standard deviation. Two-sided Student's *t*-test was used for comparison. \*  $p < 0.05$ , \*\*  $p < 0.01$

## Supplemental Figure 4

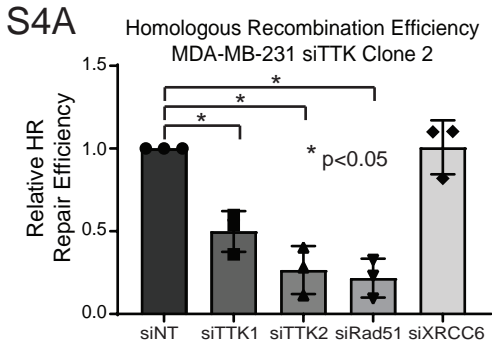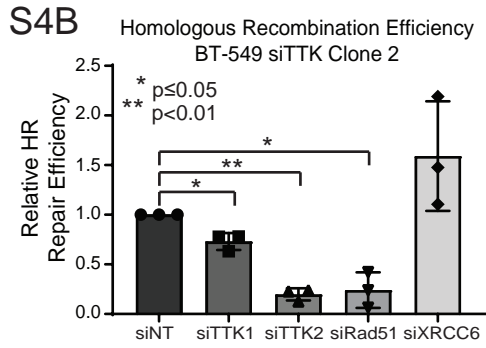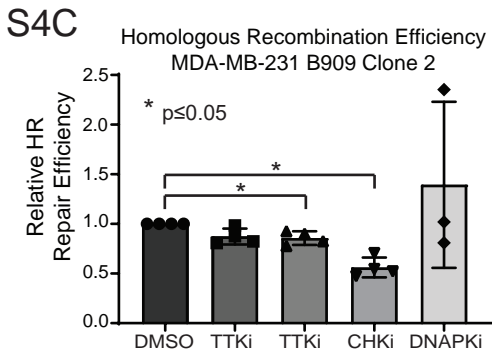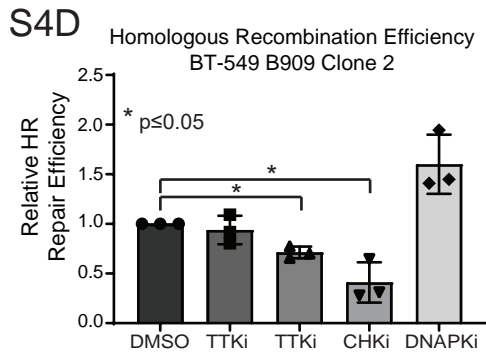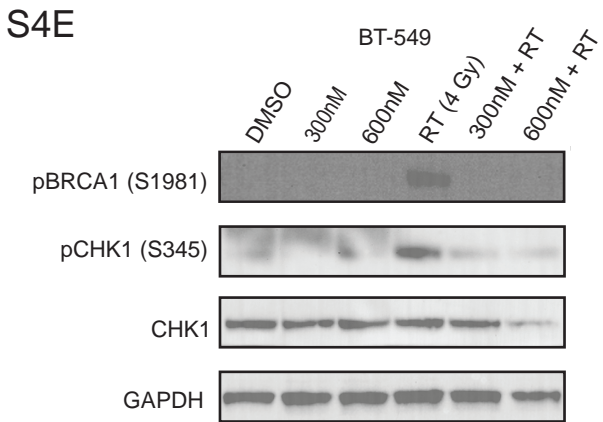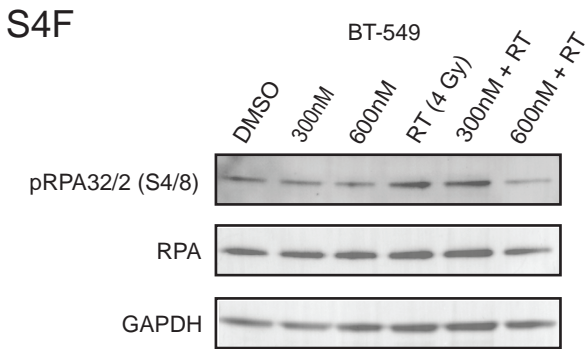



**Supplemental Figure 4:** Homologous recombination (HR) efficiency is reduced by TTK inhibition in a second stable HR specific reporter clone and through western blot analysis. **A&B)** Knockdown of TTK by siRNA significantly reduces HR efficiency in MDA-MB-231 (A) and BT-549 (B) cells. **C&D)** TTK inhibition by Bayer 1161909 reduces HR efficiency in MDA-MB-231 (C) and BT-549 (D) cells. Data represent the mean of 3-4 independent experiments and error bars represent standard deviation. **E)** TTK inhibition reduces phospho-BRCA1 and phospho-CHK1 after RT compared to RT alone in BT-549 cells. Western blots represent two independent experiments. **F)** TTK inhibition reduces phospho-RPA after RT compared to RT alone in and BT-549 cells. Western blots represent two independent experiments. One-way ANOVA with Dunnett's multiple comparisons test was used for comparison. \* $p \leq 0.05$ , \*\* $p < 0.01$ .

# Supplemental Figure 5

S5A

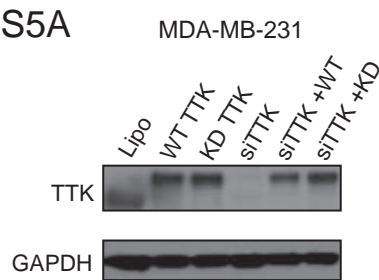

S5B

| MDA-MB-231 TTK Rescue Clonogenic Survival Assay |                   |              |
|-------------------------------------------------|-------------------|--------------|
| Treatment                                       | Enhancement Ratio | Cytotoxicity |
| Lipo                                            | 1.0               | 1.0          |
| siTTK                                           | 1.19 ±0.06        | 0.69 ±0.16   |
| siTTK + WT TTK                                  | 1.46 ±0.13        | 0.63 ±0.19   |
| siTTK + KD TTK                                  | 1.97 ±0.22        | 0.36 ±0.21   |

S5C

| SUM-159 TTK Rescue Clonogenic Survival Assay |                   |              |
|----------------------------------------------|-------------------|--------------|
| Treatment                                    | Enhancement Ratio | Cytotoxicity |
| Lipo                                         | 1.0               | 1.0          |
| siTTK                                        | 1.48 ±0.15        | 0.15 ±0.11   |
| siTTK + WT TTK                               | 1.03 ±0.09        | 0.45 ±0.18   |
| siTTK + KD TTK                               | 1.29 ±0.09        | 0.41 ±0.15   |

S5D

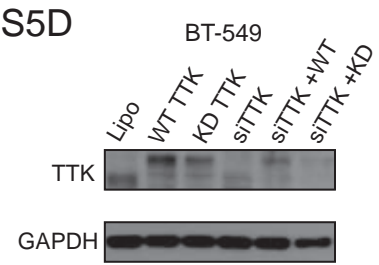

**Supplemental Figure 5:** TTK rescue representative western blots and clonogenic assay cytotoxicity information. **A)** Representative western blot of TTK knockdown by siRNA and overexpression of wild-type (WT) or kinase dead (KD) TTK. **B&C)** Cytotoxicity and radiation enhancement ratio information for MDA-MB-231 (B) and SUM-159 (C) clonogenic assays. **D)** Representative western blot of TTK knockdown by siRNA and overexpression of WT or KD TTK in the BT-549 cell line. Western blots are representative of duplicate experiments.

# Supplemental Figure 6

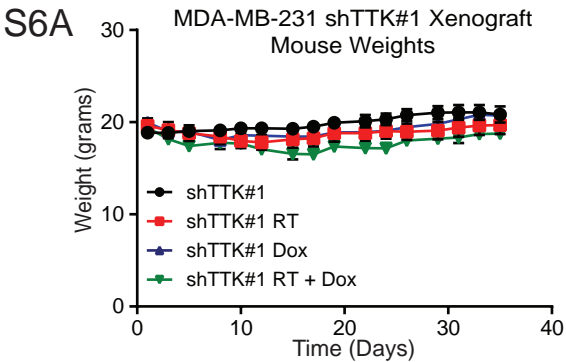

**S6B** MDA-MB-231 shTTK#1 Xenograft Fractional Tumor Volume (FTV)

| Day | Dox  | RT   | Combination |          | Ratio |
|-----|------|------|-------------|----------|-------|
|     |      |      | Expected    | Observed |       |
| 10  | 0.79 | 0.95 | 0.75        | 0.79     | 0.96  |
| 22  | 0.60 | 0.58 | 0.34        | 0.37     | 0.94  |
| 31  | 0.51 | 0.40 | 0.21        | 0.23     | 0.89  |
| 33  | 0.51 | 0.38 | 0.19        | 0.21     | 0.91  |
| 35  | 0.50 | 0.35 | 0.17        | 0.20     | 0.92  |

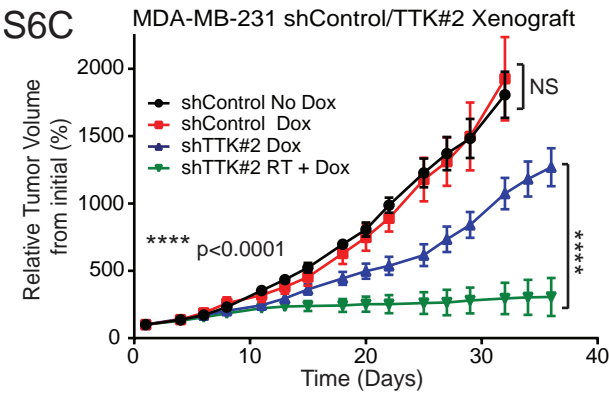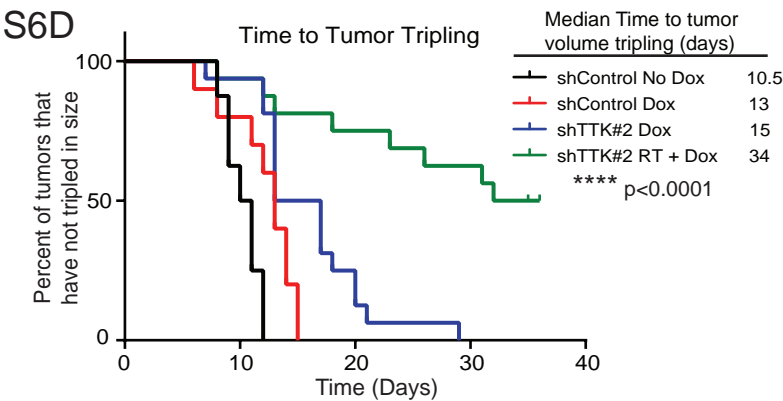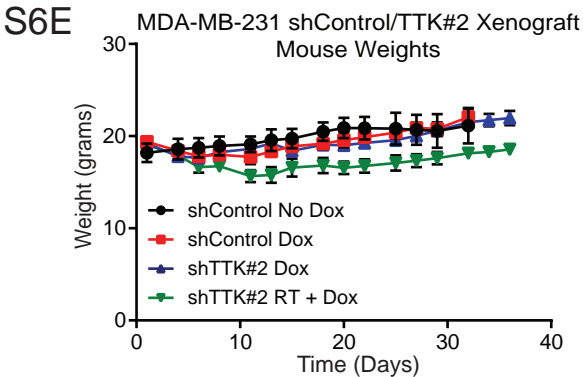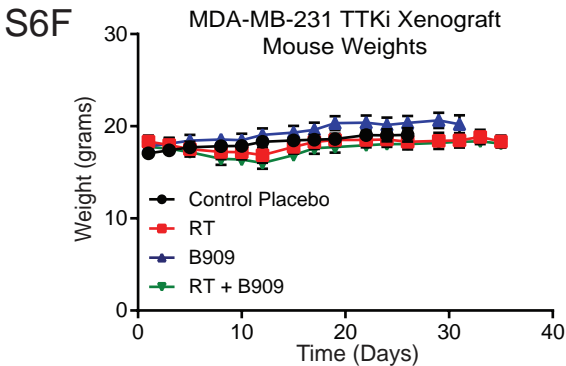

**S6G** MDA-MB-231 B909 Xenograft Fractional Tumor Volume (FTV)

| Day | RT   | B909 | Combination |          | Ratio |
|-----|------|------|-------------|----------|-------|
|     |      |      | Expected    | Observed |       |
| 8   | 0.77 | 0.80 | 0.62        | 0.69     | 0.90  |
| 15  | 0.52 | 0.67 | 0.35        | 0.42     | 0.83  |
| 22  | 0.38 | 0.74 | 0.28        | 0.25     | 1.12  |
| 24  | 0.37 | 0.78 | 0.29        | 0.23     | 1.24  |
| 26  | 0.35 | 0.76 | 0.27        | 0.21     | 1.28  |

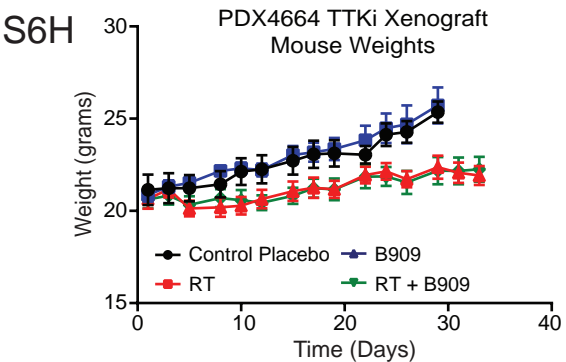

**S6I** PDX4664 B909 Xenograft Fractional Tumor Volume (FTV)

| Day | RT   | B909 | Combination |          | Ratio |
|-----|------|------|-------------|----------|-------|
|     |      |      | Expected    | Observed |       |
| 8   | 0.73 | 0.74 | 0.54        | 0.59     | 0.92  |
| 15  | 0.50 | 0.72 | 0.36        | 0.34     | 1.07  |
| 22  | 0.39 | 0.85 | 0.33        | 0.23     | 1.43  |
| 24  | 0.36 | 0.89 | 0.32        | 0.21     | 1.52  |
| 26  | 0.34 | 0.88 | 0.30        | 0.19     | 1.63  |

**Supplemental Figure 6:** *In vivo* studies additional information. **A)** MDA-MB-231 shTTK#1 mouse weights from *in vivo* study. **B)** Additive/synergistic analysis for MDA-MB-231 shTTK#1 *in vivo* study using fractional tumor volume (FTV) method. **C)** In a second dox inducible MDA-MB-231 shTTK cell line (shTTK#2), tumor growth is inhibited by a combination of dox and RT compared to dox alone, while dox has no effect on shControl cells. Two-sided Student's *t*-test was used for analyses. Error bars represent standard error of the mean. **D)** Combination treatment (dox + RT) leads to increased time to tumor tripling, while dox alone has no effect on shControl cells (n=16 tumors per group). Log-rank (Mantel-Cox) tests were used for analyses. **E)** Mouse weights from MDA-MB-231 shControl/shTTK#2 *in vivo* study. **F)** Mouse weights from MDA-MB-231 Bayer 1161909 (B909) *in vivo* study. **G)** Additive/synergistic analysis for MDA-MB-231 B909 *in vivo* study using the FTV method. **H)** Mouse weights from the PDX4664 orthotopic study. **I)** Additive/synergistic analysis for PDX4664 B909 *in vivo* study using the FTV method. \*\*\*\*p<0.0001.

Supplemental Table 1:

| Antibody                                   | Company              | Number            | Clone      | Dilution/Conc. Used/Sequence |
|--------------------------------------------|----------------------|-------------------|------------|------------------------------|
| TTK                                        | Santa Cruz           | 376842            | D-8        | 1:1,000                      |
| RAD51                                      | Santa Cruz           | 8349              | H-92       | 1:2,000                      |
| GAPDH                                      | Cell Signaling       | 2118              | 14C10      | 1:10,000                     |
| Histone 3                                  | Cell Signaling       | 9715S             | polyclonal | 1:1,000                      |
| p-Histone 3 (Ser10)                        | Cell Signaling       | 9701S             | polyclonal | 1:1,000                      |
| Mouse Secondary                            | Cell Signaling       | 7076s             | polyclonal | 1:10,000                     |
| Rabbit Secondary                           | Cell Signaling       | 7074s             | polyclonal | 1:10,000                     |
| pRPA S4/8                                  | Bethyl Lab           | BL-165-5F1        | BL-165-5F1 | 1:1,000                      |
| RPA                                        | Cell Signaling       | 52448             | polyclonal | 1:1,000                      |
| pKu80 T714                                 | Invitrogen           | 38118             | polyclonal | 1:1,000                      |
| Ku80                                       | Cell Signaling       | 2180              | C48E7      | 1:1,000                      |
| pChk1 S345                                 | Cell Signaling       | 2341S             | polyclonal | 1:1,000                      |
| Chk1                                       | Santa Cruz           | 8408              | G-4        | 1:1,000                      |
| pBRCA1 S1524                               | Cell Signaling       | 9009S             | polyclonal | 1:1,000                      |
| BRCA1                                      | Santa Cruz           | 6954              | D-9        | 1:1,000                      |
|                                            |                      |                   |            |                              |
| vH2AX (Ser139)                             | Millipore            | 3076468           | JBW301     | 1:2,000                      |
| Goat anti-Mouse IgG Alexa Fluor 594        | ThermoFisher         | A-11005           | polyclonal | 1:2,000                      |
| RAD51                                      | Santa Cruz           | 8349              | H-92       | 1:300                        |
| Goat anti-Rabbit Secondary Alexa Fluor 488 | ThermoFisher         | A-11008           | polyclonal | 1:2,000                      |
| DAPI ProLong Gold Antifade Mountant        | ThermoFisher         | P36931            |            | Manufacturer's Instructions  |
|                                            |                      |                   |            |                              |
| <b>Drugs/Compounds</b>                     |                      |                   |            |                              |
|                                            |                      |                   |            |                              |
| Bayer 1161909 (Empesertib)                 | MedChemExpress       | HY-12858          |            | Varied                       |
| NMS-P715                                   | MedChemExpress       | HY-12382          |            | 1.5µM                        |
| AZD7762                                    | Gift from Morgan Lab |                   |            | 100nM                        |
| NU7441                                     | Selleckchem          | Ku-57788          |            | 1.5µM                        |
| Doxycycline hyclate                        | Sigma                | D9891             |            | 2.0ug/mL                     |
| G418 (Geneticin)                           | ThermoFisher         | 10131035          |            | 300ug/mL                     |
|                                            |                      |                   |            |                              |
| <b>siRNA/shRNA</b>                         |                      |                   |            |                              |
|                                            |                      |                   |            |                              |
| siTTK#1                                    | Dharmacon            |                   |            | TGAACAAAGTGAGAGACAT          |
| siTTK#2                                    | Dharmacon            |                   |            | TTGGACTGTTATACTCTTGAA        |
| siRAD51                                    | Dharmacon            | J-003530-10       |            |                              |
| siXRCC6                                    | Dharmacon            | L-005084-00       |            | SMARTpool                    |
| ON-TARGETplus Non-targeting Control Pool   | Dharmacon            | D-001810-10       |            | Pooled                       |
| TRIPZ Inducible Lentiviral shRNA (TTK)     | Dharmacon            | RHS4696-201906503 |            | TTCTTTTTCATTTAACACCT         |
|                                            |                      |                   |            |                              |
| <b>Primers - NHEJ Reporter System</b>      |                      |                   |            |                              |
|                                            |                      |                   |            |                              |
| Rejoined F                                 | IDT                  |                   |            | GCTGGTTTAGTGAACCGTCAG        |
| Rejoined R                                 | IDT                  |                   |            | GCTGAACCTGTGGCCGTTTA         |
| Uncut F                                    | IDT                  |                   |            | TACATCAATGGGCGTGGATA         |
| Uncut R                                    | IDT                  |                   |            | AAGTCCCGTTGATTTTGGTG         |

**Supplemental Table 1:** Extended information for reagents used.
